# Supplementary material
Source: PubMed Central journal article supplement (PMC4218961)
Supplement: ncomms6194-s1.pdf [file ncomms6194-s1.pdf]

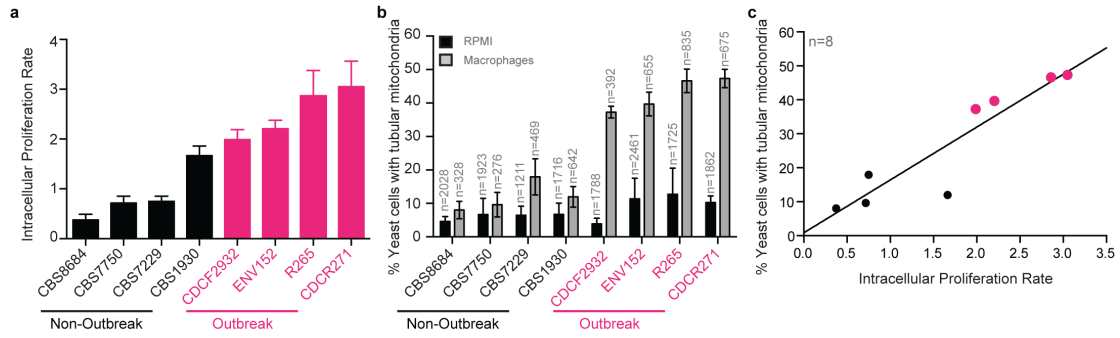

1  
2 **Supplementary Figure 1 Intracellular yeast cell fate in primary human macrophages from**  
3 **peripheral blood. a)** Intracellular proliferation of four non-outbreak and four outbreak strains  
4 after phagocytosis by primary human macrophages isolated from peripheral blood. Data were  
5 collected from six independent experiments, presented as mean averages with SEM. **b)**  
6 Mitochondrial morphology of four non-outbreak and four outbreak strains was assessed after  
7 phagocytosis by primary human macrophages isolated from peripheral blood and under control  
8 conditions (RPMI growth media). Categorical data were collected from three independent  
9 repeats examining mitochondrial morphology in 276-2,461 yeast cells. **c)** The formation of  
10 tubular mitochondria in response to encounter of the intracellular niche positively correlates  
11 with the ability to proliferate within macrophages (Linear regression, Pearson Correlation:  
12  $R^2=0.848$ ;  $p=0.001$ ). Data were obtained from results presented in Supplementary Fig. 1a, b.

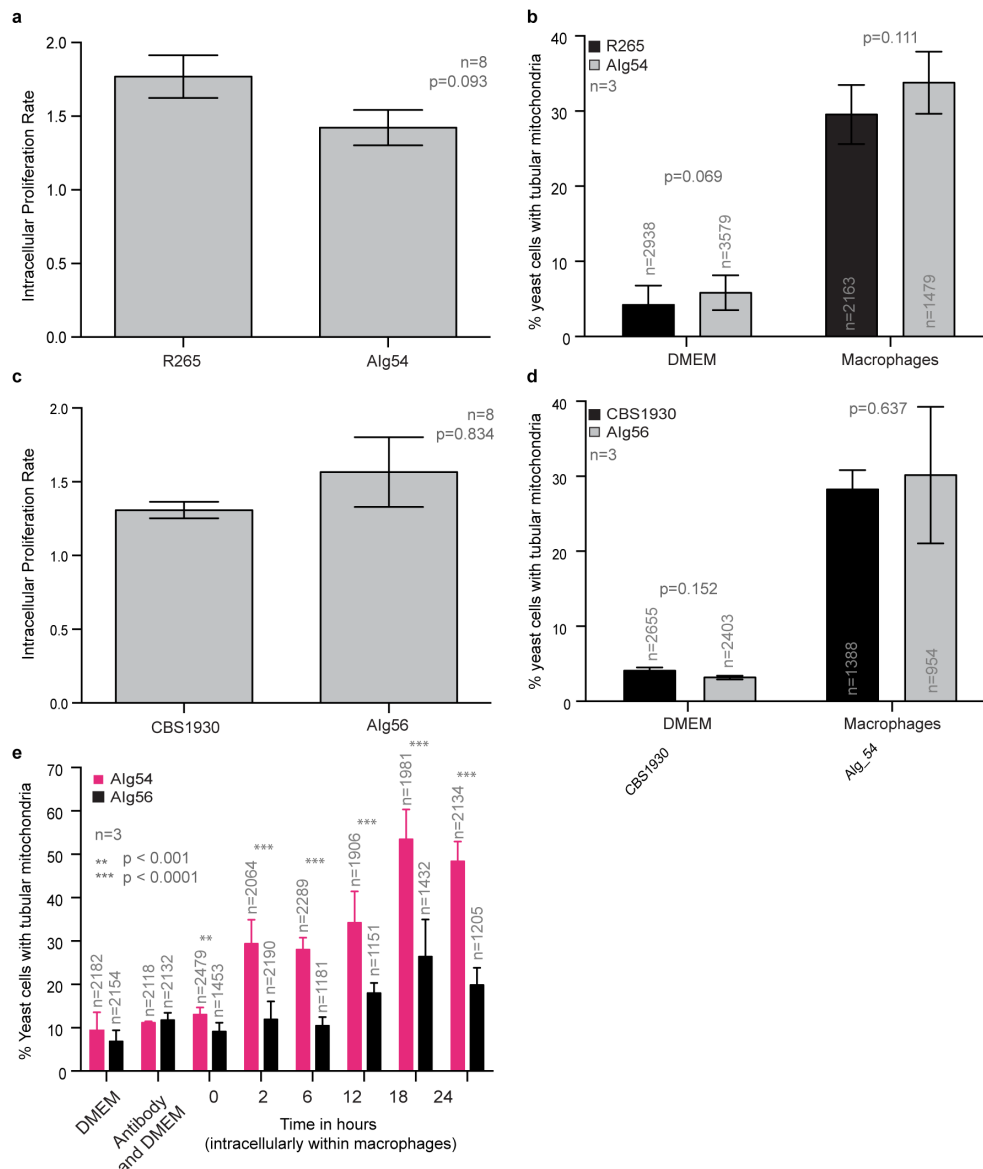

13  
 14 **Supplementary Figure 2 Analysis of transgenic strains expressing GFP.** The outbreak and the  
 15 non-outbreak cryptococcal HEM15-GFP strains Alg54 and Alg56, respectively, with genetically  
 16 encoded GFP-tagged mitochondria do not show altered behaviour in a macrophage model. **a and**  
 17 **c)** Intracellular proliferation of the parental strains R265 and CBS1930 and the respective  
 18 mutant HEM15-GFP strains Alg54 and Alg56 in J774 cells is not significantly different. Data were  
 19 collected from eight independent experiments, presented as mean averages with SEM. Data was  
 20 analysed by Mann-Whitney U-test. **b and d)** Mitochondrial tubularisation of the parental strains  
 21 R265 and CBS1930 and the respective HEM15-GFP strains Alg54 and Alg56 under control  
 22 conditions or encounter of the intracellular macrophage niche in J774 cells is not significantly  
 23 different. Categorical data were collected from three independent repeats examining  
 24 mitochondrial morphology in 1,479-3,579 yeast cells and analysed with Fisher's Exact Test. **e)**  
 25 Mitochondrial tubularisation of both strains Alg54 and Alg56 was observed with MitoTracker  
 26 CMXRos in a macrophage infection time course experiment. Fast initiation of tubularisation was  
 27 revealed in the outbreak strain Alg54 but a delayed and much lower tubularisation response in  
 28 the non-outbreak strain Alg56. Categorical data (tubular versus non-tubular mitochondria) from  
 29 four independent experiments observing between 1,151 and 2,479 yeasts were analysed by  
 30 Fisher's Exact Test.

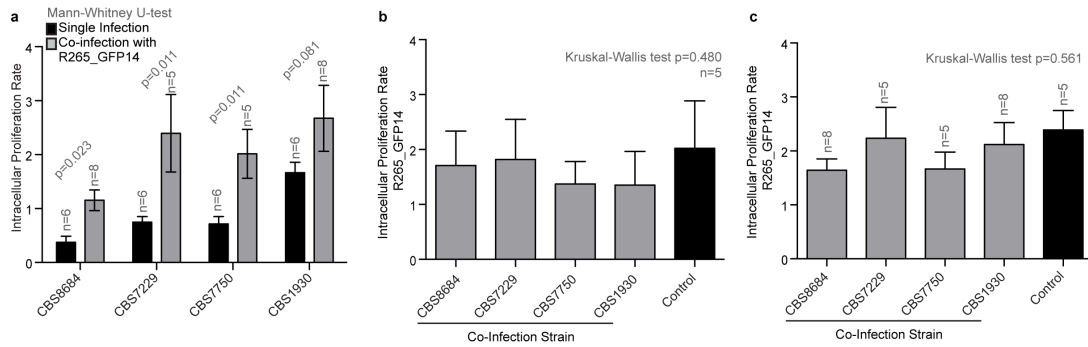

32  
33  
34  
35  
36  
37  
38  
39  
40  
41  
42  
43

Supplementary Figure 3 **Co-infection studies of outbreak and non-outbreak strains within macrophages.** **a)** Co-infection of non-outbreak strains with R265\_GFP14 also increases intracellular proliferation rates of non-outbreak strains CBS8684, CBS7229 and CBS7750 ( $p=0.023$ ,  $p=0.011$ ,  $p=0.011$ , respectively) in primary human monocyte-derived macrophages. IPR data for co-infections was obtained in parallel with IPR data for Supplementary Figure 1 and IPR data for single infections is the same in both figures. **b and c)** The proliferative potential of R265\_GFP14 after phagocytosis by J774 (b) or primary human macrophages isolated from peripheral blood (c) was not altered ( $p=0.480$  and  $p=0.562$ , respectively). Intracellular proliferation data were obtained from at least five independent experimental repeats and presented as mean averages with SEM and analysed by Mann-Whitney U-test or Kruskal-Wallis test.

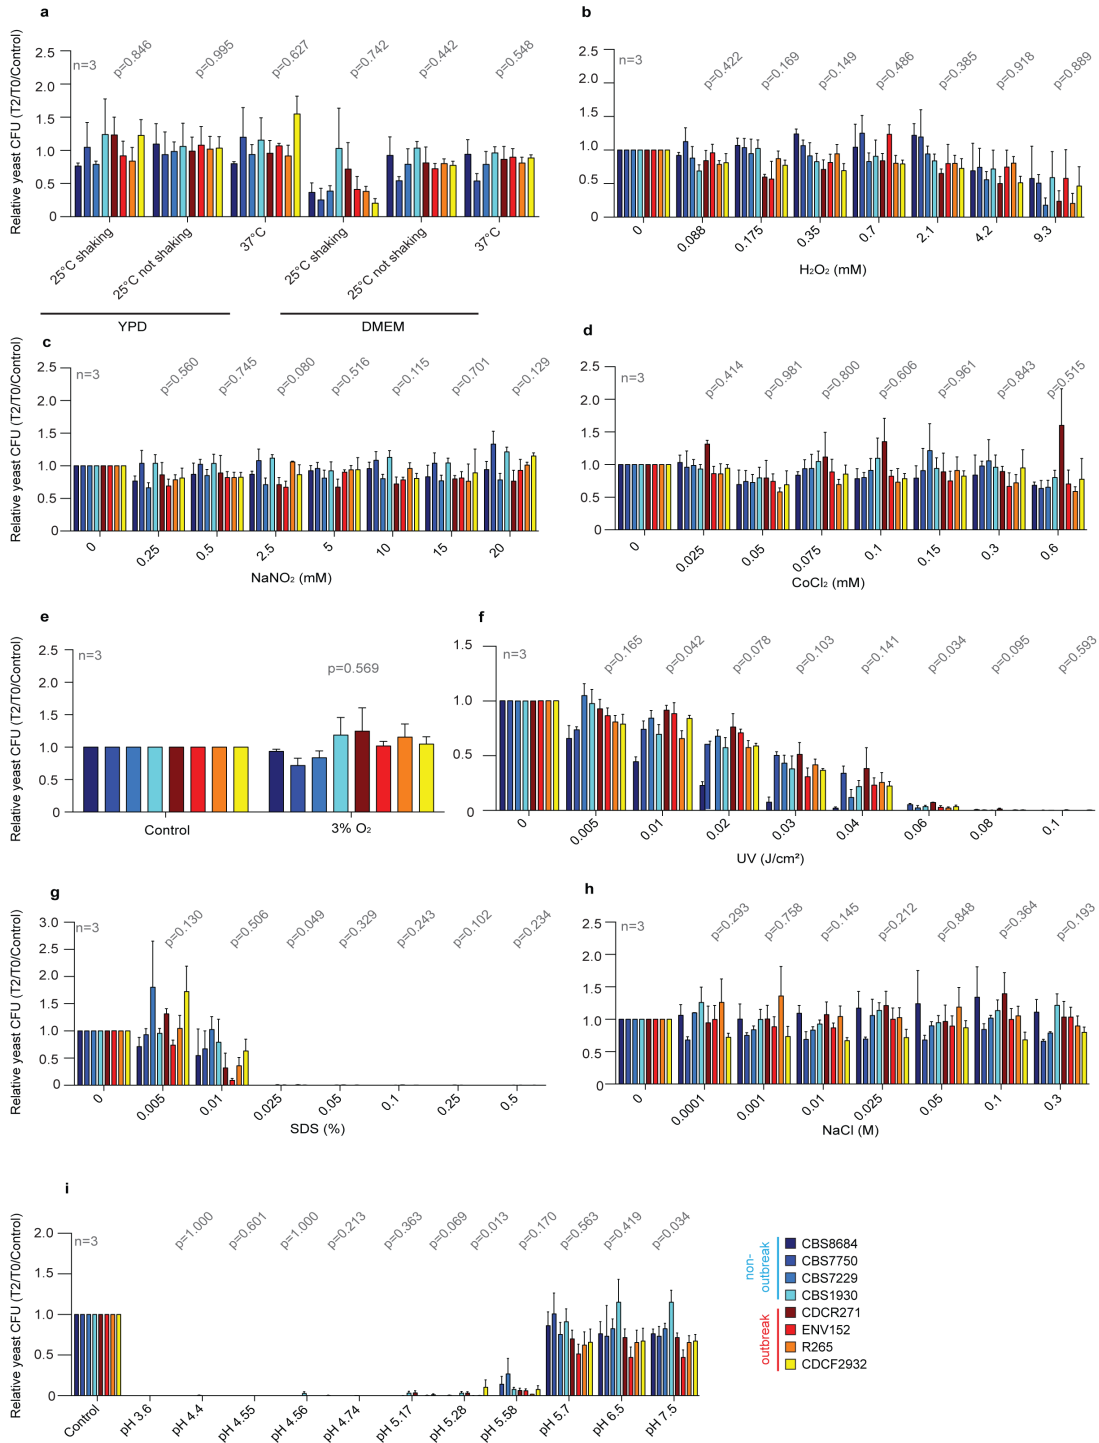

44

45 Supplementary Figure 4 ***C. gattii* survival under stress conditions**. Four outbreak strains and  
 46 four non-outbreak strains were tested for their survival under oxidative (H<sub>2</sub>O<sub>2</sub>), nitrosative  
 47 (NaNO<sub>2</sub>), low oxygen (CoCl<sub>2</sub>, 3% O<sub>2</sub>), UV, cell wall (SDS, NaCl) and acid (pH) stress (**a-i**). No  
 48 trends towards improved or reduced survival of the outbreak population compared to the non-  
 49 outbreak population after two hours of exposure to the stresses was observed. Data were  
 50 obtained from three independent experimental repeats and presented as mean averages with  
 51 SEM and analysed by Mann-Whitney U-test.

52

53

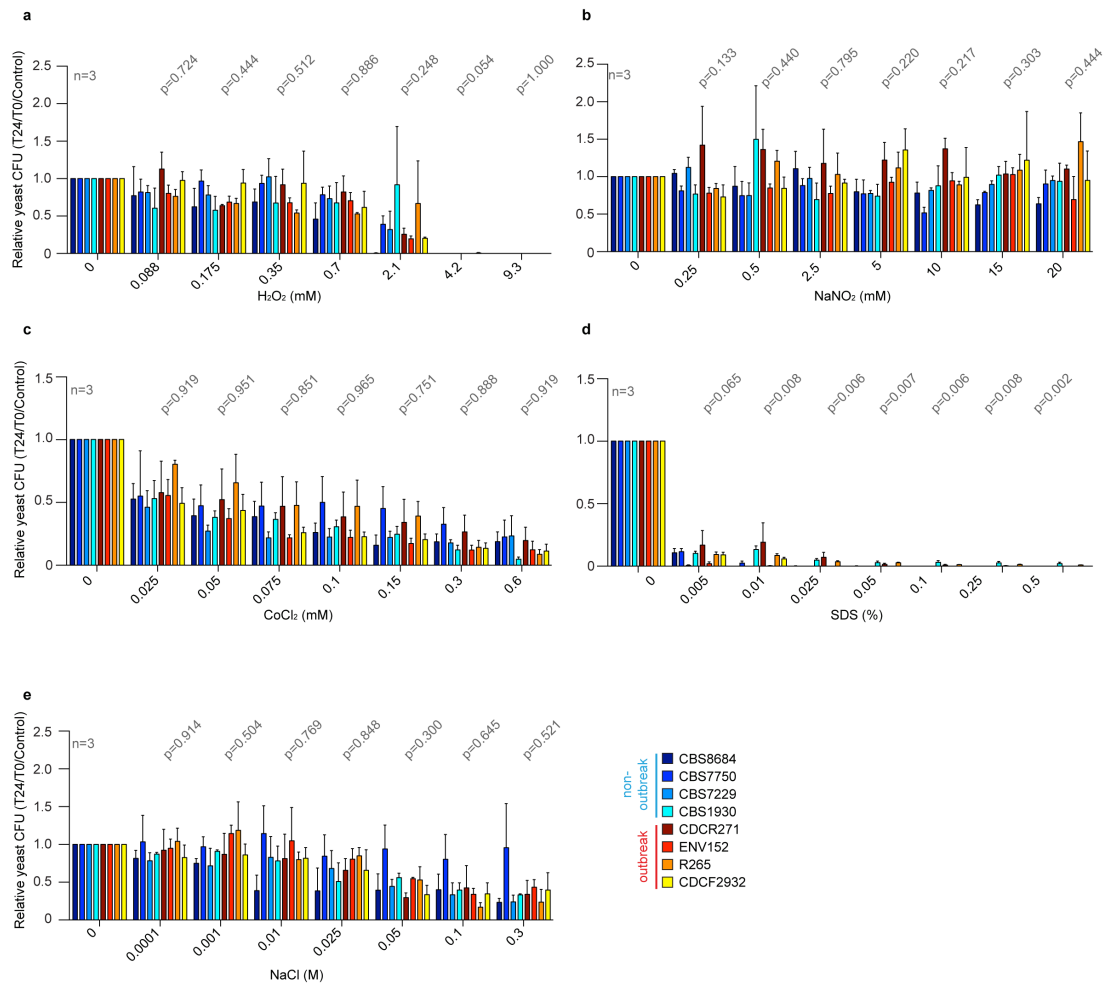

54

55 Supplementary Figure 5 ***C. gattii* growth under stress conditions**. Four outbreak strains and  
 56 four non-outbreak strains were tested for their growth under oxidative ( $H_2O_2$ ), nitrosative  
 57 ( $NaNO_2$ ), low oxygen ( $CoCl_2$ , 3%  $O_2$ ) and cell wall (SDS, NaCl) stress (**a-e**). No trend towards  
 58 improved or reduced survival of the outbreak population compared to the non-outbreak  
 59 population after 24 hours of exposure to the stresses was observed. Data were obtained from  
 60 three independent experimental repeats and presented as mean averages with SEM and analysed  
 61 by Mann-Whitney U-test.

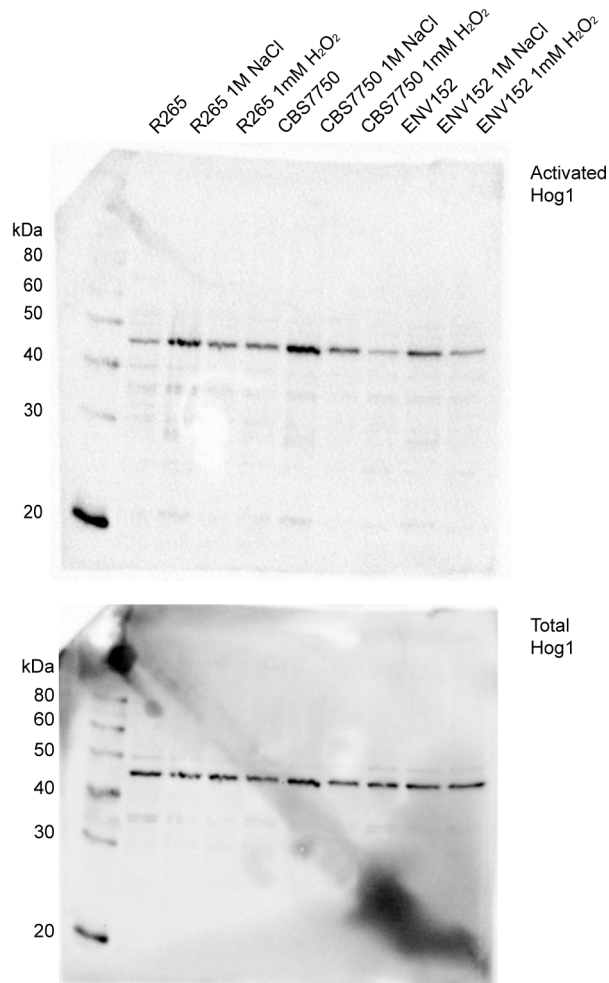

62

63 **Supplementary Figure 6 Hog1 phosphorylation is not differentially regulated in response to**  
 64 **oxidative or osmotic stress in clinical or environmental strains of *C. gattii*.** Exponential  
 65 phase cells were stressed for 30 minutes, flash-frozen and crude protein extracted. Protein (15  
 66  $\mu$ g) was separated by SDS-PAGE and phosphorylated and total Hog1 levels measured by western  
 67 blot. As previously reported, Hog1 phosphorylation is induced by osmotic shock, but activation of  
 68 this kinase was similar for all three strains tested in response to NaCl or reactive oxygen species.

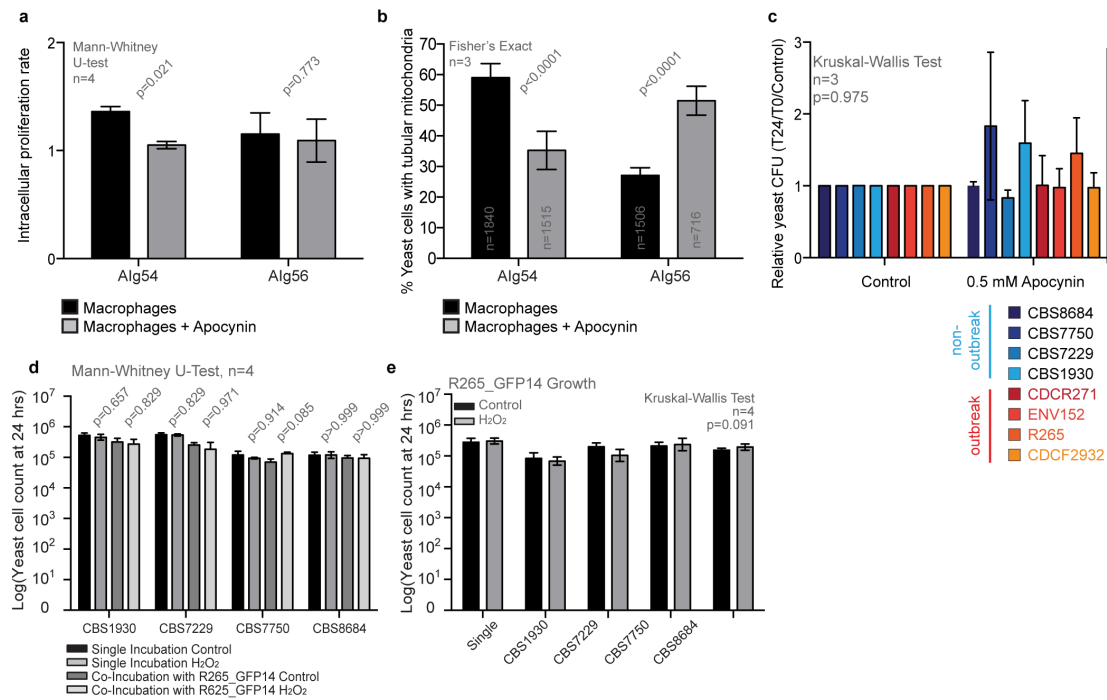

69  
70 **Supplementary Figure 7 Apocynin manipulation of ROS. a and b)** Inhibition of ROS reduced the  
71 proportion of intracellular yeasts presenting with tubular mitochondria ( $p < 0.0001$ ) in the  
72 outbreak strain Alg54 and significantly reduced the strain's ability to proliferate intracellularly  
73 ( $p = 0.021$ ). Intracellular proliferation was not significantly changed in the non-outbreak strain  
74 Alg56 ( $p = 0.773$ ) whilst mitochondrial tubularisation was significantly increased ( $p < 0.0001$ ).  
75 Data were obtained from four individual experiments determining intracellular proliferation  
76 rate, presented as mean averages with SEM and analysed by Mann-Whitney U-test. Categorical  
77 data (tubular versus non-tubular mitochondria) from three independent experiments observing  
78 between 716 and 1,840 yeasts were analysed by Fisher's Exact Test. **c)** Treatment with 0.5 mM  
79 apocynin did not significantly alter the growth of any strains tested. Data were obtained from  
80 three independent experimental repeats and presented as mean averages with SEM and analysed  
81 by Kruskal-Wallis test. **d and e)** Co-cultures of non-outbreak strains with the outbreak strain  
82 R265\_GFP14 grown *in vitro* in the presence of 0.7 mM H<sub>2</sub>O<sub>2</sub> did not increase proliferation of non-  
83 outbreak strains or alter proliferation in the co-incubation strain R265\_GFP14, suggesting that  
84 ROS-induced mitochondrial tubularisation induces a pathogen response that protects cryptococci  
85 from their macrophage host, rather than conferring a direct resistance to oxidative damage per  
86 se. Data were obtained from four independent experimental repeats and presented as mean  
87 averages with SEM and analysed by Mann-Whitney U-test or Kruskal-Wallis Test.

88

89

90

91

92

93

94

95

96

97

| <b>Species and Strains</b>                 | <b>Reference</b>                                 |
|--------------------------------------------|--------------------------------------------------|
| <i>C. gattii</i> CBS10089                  | Velegraki <i>et al.</i> 2001 <sup>1</sup>        |
| <i>C. gattii</i> CBS10090                  | Velegraki <i>et al.</i> 2001 <sup>1</sup>        |
| <i>C. gattii</i> CBS10101                  | Bolton <i>et al.</i> 1999 <sup>2</sup>           |
| <i>C. gattii</i> CBS10485                  | Lindberg <i>et al.</i> 2007 <sup>3</sup>         |
| <i>C. gattii</i> CBS6955                   | Kwon-Chung 1976 <sup>4</sup>                     |
| <i>C. gattii</i> CBS6993                   | Boekhout <i>et al.</i> 1997 <sup>5</sup>         |
| <i>C. gattii</i> CDCF3016                  | Kidd <i>et al.</i> 2004 <sup>6</sup>             |
| <i>C. gattii</i> NIH312xCBS10090 progeny 5 | Voelz <i>et al.</i> 2013 <sup>7</sup>            |
| <i>C. gattii</i> EJB18                     | Byrnes <i>et al.</i> 2010 <sup>8</sup>           |
| <i>C. gattii</i> EJB52                     | Byrnes <i>et al.</i> 2010 <sup>8</sup>           |
| <i>C. gattii</i> ICB180                    | Hagen <i>et al.</i> 2012 <sup>9</sup>            |
| <i>C. gattii</i> ICB184                    | Pereira <i>et al.</i> 2009 <sup>10</sup>         |
| <i>C. gattii</i> LA362                     | Meyer <i>et al.</i> 2003 <sup>11</sup>           |
| <i>C. gattii</i> LMM265                    | Trilles <i>et al.</i> 2008 <sup>12</sup>         |
| <i>C. gattii</i> WM276                     | Chaturvedi <i>et al.</i> 2005 <sup>13</sup>      |
| <i>C. gattii</i> NIH312                    | Schmeding <i>et al.</i> 1981 <sup>14</sup>       |
| <i>C. gattii</i> R265_GFP14                | Voelz <i>et al.</i> 2010 <sup>15</sup>           |
| <i>C. gattii</i> R265                      | Kidd <i>et al.</i> 2004 <sup>6</sup>             |
| <i>C. gattii</i> CDCR271                   | Kidd <i>et al.</i> 2004 <sup>6</sup>             |
| <i>C. gattii</i> CDCF2932                  | Kidd <i>et al.</i> 2004 <sup>6</sup>             |
| <i>C. gattii</i> ENV152                    | Kidd <i>et al.</i> 2004 <sup>6</sup>             |
| <i>C. gattii</i> CBS8684                   | Fraser <i>et al.</i> 2005 <sup>16</sup>          |
| <i>C. gattii</i> CBS7750                   | Boekhout <i>et al.</i> 1997 <sup>5</sup>         |
| <i>C. gattii</i> CBS1930                   | Boekhout <i>et al.</i> 1997 <sup>5</sup>         |
| <i>C. gattii</i> CBS7229                   | Boekhout <i>et al.</i> 1997 <sup>5</sup>         |
| <i>C. gattii</i> Alg54                     | this study                                       |
| <i>C. gattii</i> Alg56                     | this study                                       |
| <i>C. neoformans</i> ATCC90112             | Espinel-Ingroff <i>et al.</i> 1992 <sup>17</sup> |
| <i>C. neoformans</i> CBS8336               | Lazera <i>et al.</i> 1996 <sup>18</sup>          |
| <i>C. neoformans</i> H99                   | Perfect <i>et al.</i> 2001 <sup>19</sup>         |
| <i>C. neoformans</i> BD5                   | Boekhout <i>et al.</i> 2001 <sup>20</sup>        |
| <i>C. neoformans</i> CBS6995               | Boekhout <i>et al.</i> 1997 <sup>5</sup>         |
| <i>C. neoformans</i> JEC21                 | Kwon-Chung, Edman & Wickes 1992 <sup>21</sup>    |
| <i>C. neoformans</i> A1-84-14              | Litvintseva & Mitchell 2009 <sup>22</sup>        |
| <i>C. neoformans</i> A5-35-17              | Litvintseva & Mitchell 2009 <sup>22</sup>        |
| <i>C. neoformans</i> Tu406-1               | Litvintseva <i>et al.</i> 2011 <sup>23</sup>     |
| <i>C. neoformans</i> A1-38-2               | Litvintseva & Mitchell 2009 <sup>22</sup>        |
| <i>C. neoformans</i> Tu369-2               | Litvintseva <i>et al.</i> 2011 <sup>23</sup>     |
| <i>C. neoformans</i> A4-34-6               | Litvintseva & Mitchell 2009 <sup>22</sup>        |
| <i>C. neoformans</i> A7-35-23              | Litvintseva & Mitchell 2009 <sup>22</sup>        |
| <i>C. neoformans</i> A1-35-8               | Litvintseva & Mitchell 2009 <sup>22</sup>        |



101  
 102  
 103  
 104  
 105  
 106  
 107  
 108

**Supplementary Table 2:** Experimental repeats (n) and number of yeast cells observed for data presented in Figure 1.

| Strain                    | IPR<br>(n) | Tubularisation<br>(n) (yeast scored) |
|---------------------------|------------|--------------------------------------|
| <i>C. gattii</i>          |            |                                      |
| ICB180                    | 4          | 3 759                                |
| CBS10089                  | 4          | 3 1261                               |
| ICB184                    | 6          | 3 444                                |
| CBS6955                   | 6          | 3 324                                |
| NIH312                    | 7          | 3 493                                |
| CBS8684                   | 8          | 3 471                                |
| CBS7229                   | 4          | 3 979                                |
| WM276                     | 5          | 3 859                                |
| NIH312xCBS10090 Progeny 5 | 7          | 3 420                                |
| CBS1930                   | 8          | 3 504                                |
| CBS10101                  | 4          | 3 490                                |
| <b>EJB52</b>              | <b>5</b>   | <b>3 568</b>                         |
| CBS6993                   | 6          | 3 871                                |
| LA362                     | 4          | 3 1176                               |
| <b>CDCF3016</b>           | <b>7</b>   | <b>3 1117</b>                        |
| <b>EJB18</b>              | <b>7</b>   | <b>3 780</b>                         |
| <b>R265</b>               | <b>5</b>   | <b>3 1649</b>                        |
| CBS10090                  | 7          | 3 1858                               |
| <b>CBS10485</b>           | <b>7</b>   | <b>3 1443</b>                        |
| <b>R265_GFP14</b>         | <b>7</b>   | <b>3 1017</b>                        |
| <b>CDCR271</b>            | <b>5</b>   | <b>3 1024</b>                        |
| <b>CDCF2932</b>           | <b>5</b>   | <b>3 958</b>                         |
| <b>ENV152</b>             | <b>7</b>   | <b>3 606</b>                         |
| LMM265                    | 6          | 3 1375                               |
| <i>C. neoformans</i>      |            |                                      |
| CBS8336                   | 3          | 3 961                                |
| A5_35_17                  | 8          | 3 1410                               |
| CBS6995                   | 3          | 3 2185                               |
| H99                       | 3          | 3 2319                               |
| A4_34_6                   | 8          | 3 2696                               |
| Tu_369_1                  | 8          | 3 2435                               |
| BD5                       | 3          | 3 2029                               |
| A1_38_2                   | 8          | 3 2596                               |

|           |   |   |      |
|-----------|---|---|------|
| JEC21     | 3 | 3 | 3589 |
| A1_35_8   | 8 | 3 | 2293 |
| A7_35_23  | 8 | 3 | 3150 |
| Tu_406_1  | 8 | 3 | 2691 |
| ATCC90112 | 3 | 3 | 2325 |
| A1_84_14  | 8 | 3 | 2499 |

109

110

111 **Supplementary Table 3:** Experimental repeats (n) and number of yeast cells observed for data  
112 presented in Figure 2.

| Time        | CDCF2932 |              | CBS8684 |              |
|-------------|----------|--------------|---------|--------------|
|             | n        | yeast scored | n       | yeast scored |
| DMEM        | 3        | 4059         | 3       | 2359         |
| AB and DMEM | 3        | 3496         | 3       | 4114         |
| 0           | 4        | 1143         | 4       | 2071         |
| 2           | 4        | 894          | 4       | 1226         |
| 6           | 4        | 1415         | 3       | 1806         |
| 12          | 4        | 1594         | 4       | 1579         |
| 18          | 4        | 1677         | 4       | 2497         |
| 24          | 3        | 1293         | 3       | 1470         |

113

114 **Supplementary Table 4:** Mean averages  $\pm$  SEM, experimental repeats (n) and number of yeast  
115 cells observed for data presented in Figure 5 a-i. **a)** IPR; **b)** Mitochondrial tubularisation.

116

**a)**

| Strain   | IPR            |    |
|----------|----------------|----|
|          | Mean $\pm$ SEM | n  |
| CBS8684  | 0.9 $\pm$ 0.2  | 17 |
| CBS7229  | 1.0 $\pm$ 0.1  | 13 |
| CBS7750  | 1.0 $\pm$ 0.1  | 9  |
| CBS1930  | 1.2 $\pm$ 0.1  | 17 |
| CDCR271  | 1.9 $\pm$ 0.2  | 14 |
| R265     | 1.9 $\pm$ 0.1  | 14 |
| ENV152   | 2.1 $\pm$ 0.2  | 16 |
| CDCF2932 | 2.3 $\pm$ 0.1  | 14 |

117

118

**b)**

|                               | Tubularisation  |   |              |                |   |              |                 |   |              |                |   |              |
|-------------------------------|-----------------|---|--------------|----------------|---|--------------|-----------------|---|--------------|----------------|---|--------------|
|                               | CBS8684         |   |              | CBS7229        |   |              | CBS7750         |   |              | CB1930         |   |              |
|                               | Mean $\pm$ SEM  | n | yeast scored | Mean $\pm$ SEM | n | yeast scored | Mean $\pm$ SEM  | n | yeast scored | Mean $\pm$ SEM | n | yeast scored |
| Macrophages                   | 2.9 $\pm$ 0.7   | 8 | 2507         | 1.0 $\pm$ 1.0  | 4 | 691          | 8.1 $\pm$ 2.9   | 5 | 848          | 11.8 $\pm$ 1.2 | 3 | 646          |
| H <sub>2</sub> O <sub>2</sub> | 2.3 $\pm$ 0.2   | 3 | 1551         | 2.8 $\pm$ 0.2  | 3 | 502          | 8.7 $\pm$ 0.6   | 3 | 782          | 9.1 $\pm$ 2.4  | 3 | 567          |
| NaNO <sub>2</sub>             | 10.2 $\pm$ 3.9  | 4 | 1345         | 5.3 $\pm$ 1.6  | 4 | 1514         | 7.3 $\pm$ 1.0   | 3 | 1069         | 6.4 $\pm$ 1.6  | 4 | 947          |
| CoCl <sub>2</sub>             | 4.0 $\pm$ 1.4   | 4 | 1794         | 6.9 $\pm$ 1.0  | 4 | 1318         | 8.0 $\pm$ 2.0   | 4 | 1257         | 11.8 $\pm$ 1.0 | 4 | 1120         |
| O <sub>2</sub>                | 5.7 $\pm$ 1.2   | 4 | 2169         | 8.9 $\pm$ 2.3  | 4 | 838          | 9.8 $\pm$ 1.6   | 4 | 2271         | 17.1 $\pm$ 4.3 | 4 | 1065         |
| UV                            | 3.9 $\pm$ 0.1   | 3 | 1484         | 5.7 $\pm$ 0.6  | 3 | 1290         | 3.9 $\pm$ 0.2   | 3 | 1443         | 9.2 $\pm$ 3.6  | 3 | 1942         |
| SDS                           | 13.7 $\pm$ 4.5  | 4 | 2708         | 13.9 $\pm$ 2.8 | 4 | 4859         | 12.2 $\pm$ 0.8  | 4 | 3255         | 18.0 $\pm$ 4.9 | 4 | 2731         |
| NaCl                          | 9.7 $\pm$ 0.7   | 3 | 1051         | 22.2 $\pm$ 5.4 | 3 | 888          | 24.4 $\pm$ 2.8  | 3 | 1212         | 14.4 $\pm$ 2.3 | 3 | 786          |
| Acid                          | 35.8 $\pm$ 1.0  | 3 | 5550         | 31.3 $\pm$ 0.8 | 3 | 5751         | 3.5 $\pm$ 0.7   | 3 | 6810         | 16.0 $\pm$ 3.0 | 3 | 5770         |
|                               | CDCR271         |   |              | R265           |   |              | ENV152          |   |              | CDCF2932       |   |              |
|                               | Mean $\pm$ SEM  | n | yeast scored | Mean $\pm$ SEM | n | yeast scored | Mean $\pm$ SEM  | n | yeast scored | Mean $\pm$ SEM | n | yeast scored |
| Macrophages                   | 21.3 $\pm$ 2.5  | 5 | 1043         | 24.5 $\pm$ 3.2 | 5 | 1267         | 33.8 $\pm$ 6.9  | 4 | 1679         | 43.2 $\pm$ 6.0 | 4 | 1483         |
| H <sub>2</sub> O <sub>2</sub> | 45.5 $\pm$ 13.6 | 3 | 594          | 38.5 $\pm$ 7.4 | 3 | 590          | 35.4 $\pm$ 10.6 | 3 | 873          | 51.8 $\pm$ 9.2 | 3 | 820          |

|                   |          |   |      |          |   |      |          |   |      |          |   |      |
|-------------------|----------|---|------|----------|---|------|----------|---|------|----------|---|------|
| NaNO <sub>2</sub> | 11.3±4.8 | 4 | 1225 | 14.3±4.0 | 4 | 1325 | 15.0±3.7 | 4 | 1410 | 16.6±4.2 | 4 | 1788 |
| CoCl <sub>2</sub> | 23.8±7.2 | 4 | 1406 | 24.2±4.3 | 4 | 1485 | 26.3±6.4 | 4 | 1176 | 25.7±5.9 | 4 | 1205 |
| O <sub>2</sub>    | 18.3±1.1 | 4 | 1126 | 16.7±8.4 | 4 | 2467 | 18.8±5.9 | 3 | 872  | 28.0±5.4 | 4 | 1115 |
| UV                | 15.7±0.3 | 3 | 1294 | 20.3±2.6 | 3 | 1406 | 8.2±2.2  | 3 | 1736 | 28.5±2.7 | 3 | 1149 |
| SDS               | 4.2±0.5  | 3 | 2163 | 2.5±0.3  | 4 | 3732 | 3.9±0.5  | 4 | 3066 | 5.8±0.8  | 4 | 3477 |
| NaCl              | 11.7±1.5 | 4 | 1085 | 21.4±3.5 | 3 | 878  | 12.0±2.5 | 3 | 889  | 13.7±3.2 | 4 | 1440 |
| Acid              | 16.2±6.3 | 3 | 4851 | 22.4±9.4 | 3 | 3870 | 18.3±6.2 | 3 | 5000 | 18.7±4.0 | 3 | 4903 |

119

120

121

122 **Supplementary Table 5:** Mean averages ± SEM and number of yeast cells observed for data  
 123 from the four outbreak and four non-outbreak strains presented in Figure 5 j.

|                               | Tubularisation       |              | Outbreak strains |              |
|-------------------------------|----------------------|--------------|------------------|--------------|
|                               | Non-outbreak strains |              | Outbreak strains |              |
|                               | Mean± SEM            | yeast scored | Mean± SEM        | yeast scored |
| YPD 25°C                      | 1.2±0.3              | 5933         | 1.0±0.3          | 5230         |
| shaking                       |                      |              |                  |              |
| YPD 37°C not                  | 2.0±0.5              | 5234         | 2.0±0.3          | 5219         |
| shaking                       |                      |              |                  |              |
| DMEM 37°C not                 | 2.6±0.7              | 3894         | 3.0±0.6          | 3938         |
| shaking                       |                      |              |                  |              |
| Macrophages                   | 6.0±2.5              | 4692         | 30.7±4.9         | 5482         |
| H <sub>2</sub> O <sub>2</sub> | 5.7±1.8              | 3402         | 42.8±3.7         | 3828         |
| NaNO <sub>2</sub>             | 8.3±1.4              | 4875         | 14.3±1.1         | 5748         |
| CoCl <sub>2</sub>             | 7.7±1.6              | 5489         | 25.0±0.6         | 5272         |
| O <sub>2</sub>                | 10.4±2.4             | 6343         | 20.4±2.6         | 5580         |
| UV                            | 5.7±0.7              | 6159         | 18.2±0.6         | 5585         |
| SDS                           | 14.5±1.2             | 13553        | 4.1±2.3          | 12438        |
| NaCl                          | 17.7±3.4             | 3937         | 14.7±2.3         | 4292         |
| Acid                          | 21.7±7.4             | 23881        | 18.9±1.3         | 18624        |

124

125 **Supplementary Table 6:** Mean averages ± SEM and number of yeast cells observed for data  
 126 from the four outbreak and four non-outbreak strains presented in Figure 6c.

|                 | Tubularisation |              | Apocynin  |              |
|-----------------|----------------|--------------|-----------|--------------|
|                 | Control        |              | Apocynin  |              |
|                 | Mean± SEM      | yeast scored | Mean± SEM | yeast scored |
| <b>CBS8684</b>  | 2.6±1.7        | 1129         | 1.4±0.9   | 996          |
| <b>CBS7750</b>  | 7.0±0.5        | 1267         | 8.6±1.1   | 612          |
| <b>CBS7229</b>  | 11.2±4.4       | 1494         | 12.6±3.5  | 1548         |
| <b>CBS1930</b>  | 27.9±13.2      | 914          | 33.1±11.4 | 669          |
| <b>CDCR271</b>  | 27.3±8.4       | 1589         | 15.7±7.0  | 1258         |
| <b>ENV152</b>   | 34.9±7.5       | 1528         | 18.4±7.3  | 971          |
| <b>R265</b>     | 43.5±8.3       | 1280         | 21.6±10.9 | 1204         |
| <b>CDCF2932</b> | 24.6±10.5      | 2209         | 18.2±5.4  | 1429         |

127

128 **Supplementary References**

- 129 1 Velegiraki, A. *et al.* First report of *Cryptococcus neoformans* var. *gattii*  
 130 serotype B from Greece. *Med Mycol* **39**, 419-422 (2001).  
 131 2 Bolton, L. A. *et al.* Cryptococcosis in captive cheetah (*Acinonyx jubatus*):  
 132 two cases. *J S Afr Vet Assoc* **70**, 35-39 (1999).

- 133 3 Lindberg, J., Hagen, F., Laursen, A., Stenderup, J. & Boekhout, T.  
134 *Cryptococcus gattii* risk for tourists visiting Vancouver Island, Canada.  
135 *Emerg Infect Dis* **13**, 178-179 (2007).
- 136 4 Kwon-Chung, K. J. A new species of *Filobasidiella*, the sexual state of  
137 *Cryptococcus neoformans* B and C serotypes. *Mycologia* **68**, 943-946  
138 (1976).
- 139 5 Boekhout, T. *et al.* Molecular typing of *Cryptococcus neoformans*:  
140 taxonomic and epidemiological aspects. *Int J Syst Bacteriol* **47**, 432-442  
141 (1997).
- 142 6 Kidd, S. E. *et al.* A rare genotype of *Cryptococcus gattii* caused the  
143 cryptococcosis outbreak on Vancouver Island (British Columbia, Canada).  
144 *Proc Natl Acad Sci U S A* **101**, 17258-17263, doi:0402981101  
145 [pii]10.1073/pnas.0402981101 (2004).
- 146 7 Voelz, K. *et al.* Transmission of hypervirulence traits via sexual  
147 reproduction within and between lineages of the human fungal pathogen  
148 *Cryptococcus gattii*. *PLoS Genet* (2013).
- 149 8 Byrnes, E. J., 3rd *et al.* Emergence and pathogenicity of highly virulent  
150 *Cryptococcus gattii* genotypes in the northwest United States. *PLoS Pathog*  
151 **6**, e1000850, doi:10.1371/journal.ppat.1000850 (2010).
- 152 9 Hagen, F. *et al.* Autochthonous and dormant *Cryptococcus gattii* infections  
153 in Europe. *Emerg Infect Dis* **18**, 1618-1624, doi:10.3201/eid1810.120068  
154 (2012).
- 155 10 Pereira, C. B. *et al.* Evaluation of laccases and melanization in clinical and  
156 environmental *Cryptococcus neoformans* samples by non-denaturing  
157 PAGE. *J Med Microbiol* **58**, 563-566, doi:58/5/563  
158 [pii]10.1099/jmm.0.007716-0 (2009).
- 159 11 Meyer, W., Castaneda, A., Jackson, S., Huynh, M. & Castaneda, E. Molecular  
160 typing of IberoAmerican *Cryptococcus neoformans* isolates. *Emerg Infect*  
161 *Dis* **9**, 189-195 (2003).
- 162 12 Trilles, L. *et al.* Regional pattern of the molecular types of *Cryptococcus*  
163 *neoformans* and *Cryptococcus gattii* in Brazil. *Mem Inst Oswaldo Cruz* **103**,  
164 455-462, doi:S0074-02762008000500008 [pii] (2008).
- 165 13 Chaturvedi, S., Ren, P., Narasipura, S. D. & Chaturvedi, V. Selection of  
166 optimal host strain for molecular pathogenesis studies on *Cryptococcus*  
167 *gattii*. *Mycopathologia* **160**, 207-215, doi:10.1007/s11046-005-0162-7  
168 (2005).
- 169 14 Schmeding, K. A., Jong, S. C. & Hugh, R. Sexual compatibility between  
170 serotypes of *Filobasidiella neoformans* (*Cryptococcus neoformans*). *Curr.*  
171 *Microbiol.* **5**, 133-138 (1981).
- 172 15 Voelz, K., Johnston, S. A., Rutherford, J. C. & May, R. C. Automated analysis  
173 of cryptococcal macrophage parasitism using GFP-tagged cryptococci.  
174 *PLoS ONE* **5**, e15968, doi:10.1371/journal.pone.0015968 (2010).
- 175 16 Fraser, J. A. *et al.* Same-sex mating and the origin of the Vancouver Island  
176 *Cryptococcus gattii* outbreak. *Nature* **437**, 1360-1364, doi:nature04220  
177 [pii]10.1038/nature04220 (2005).
- 178 17 Espinel-Ingroff, A. *et al.* Collaborative comparison of broth macrodilution  
179 and microdilution antifungal susceptibility tests. *J Clin Microbiol* **30**, 3138-  
180 3145 (1992).

- 181 18 Lazera, M. S. *et al.* Natural habitat of *Cryptococcus neoformans* var.  
182 *neoformans* in decaying wood forming hollows in living trees. *J Med Vet*  
183 *Mycol* **34**, 127-131 (1996).
- 184 19 Perfect, J. R., Lang, S. D. & Durack, D. T. Chronic cryptococcal meningitis: a  
185 new experimental model in rabbits. *Am J Pathol* **101**, 177-194 (1980).
- 186 20 Boekhout, T. *et al.* Hybrid genotypes in the pathogenic yeast *Cryptococcus*  
187 *neoformans*. *Microbiology* **147**, 891-907 (2001).
- 188 21 Kwon-Chung, K. J., Edman, J. C. & Wickes, B. L. Genetic association of  
189 mating types and virulence in *Cryptococcus neoformans*. *Infect Immun* **60**,  
190 602-605 (1992).
- 191 22 Litvintseva, A. P. & Mitchell, T. G. Most environmental isolates of  
192 *Cryptococcus neoformans* var. *grubii* (serotype A) are not lethal for mice.  
193 *Infect Immun* **77**, 3188-3195, doi:IAI.00296-09 [pii]10.1128/IAI.00296-  
194 09 (2009).
- 195 23 Litvintseva, A. P. *et al.* Evidence that the human pathogenic fungus  
196 *Cryptococcus neoformans* var. *grubii* may have evolved in Africa. *PLoS ONE*  
197 **6**, e19688, doi:10.1371/journal.pone.0019688PONE-D-11-02521 [pii]  
198 (2011).  
199
